# Supplementary material for: Combinatorial screening of wide band-gap organic solar cell materials with open-circuit voltage between 1.1 and 1.4 V
Source: Royal Society of Chemistry journal article supplement (doi:10.1039/d4ta01944j), 2024-01-01
Supplement: d4ta01944j1.pdf [file d4ta01944j1.pdf]

## Supplementary information for

### Combinatorial Screening of Wide Band-Gap Organic Solar Cell Materials with Open-Circuit Voltage between 1.1 and 1.4 V

Miquel Casademont-Viñas,<sup>a</sup> Daniel Capolat,<sup>a</sup> Arianna Quesada-Ramírez,<sup>a</sup> Matiss Reinfelds,<sup>b</sup> Gregor Trimmel,<sup>b</sup> Matteo Sanviti,<sup>c</sup> Jaime Martín,<sup>cd</sup> Alejandro R. Goñi,<sup>ae</sup> Thomas Kirchartz,<sup>fg</sup> and Mariano Campoy-Quiles\*<sup>a</sup>

---

<sup>a</sup> Institut de Ciència de Materials de Barcelona (ICMAB-CSIC), Campus de la UAB, Bellaterra, Barcelona, 08193, Spain. E-mail: [mcampoy@icmab.es](mailto:mcampoy@icmab.es)

<sup>b</sup> Institute for Chemistry and Technology of Materials, NAWI Graz, Graz University of Technology, Stremayrgasse 9, 8010 Graz, Austria

<sup>c</sup> Universidade da Coruña, Campus Industrial de Ferrol, CITENI, 15403 Ferrol, Spain

<sup>d</sup> POLYMAT, 20018 Donostia-San Sebastián, Spain

<sup>e</sup> ICREA, Passeig Lluís Companys 23, E-08010 Barcelona, Spain.

<sup>f</sup> IEKS-Photovoltaik, Forschungszentrum Jülich, Jülich, Germany.

<sup>g</sup> Faculty of Engineering and CENIDE, University of Duisburg-Essen, Duisburg, Germany.

## Section S1: Active layer materials IUPAC names

**PTQ10:** Poly[(thiophene)-alt-(6,7-difluoro-2-(2-hexyldecyloxy)quinoxaline)]

**D18:** Poly[(2,6-(4,8-bis(5-(2-ethylhexyl-3-fluoro)thiophen-2-yl)-benzo[1,2-b:4,5-b']dithiophene))-alt-5,5'-(5,8-bis(4-(2-butyloctyl)thiophen-2-yl)dithieno[3',2':3,4;2'',3'':5,6]benzo[1,2-c][1,2,5]thiadiazole)]

**PM6:** Poly[(2,6-(4,8-bis(5-(2-ethylhexyl-3-fluoro)thiophen-2-yl)-benzo[1,2-b:4,5-b']dithiophene))-alt-(5,5'-(1',3'-di-2-thienyl-5',7'-bis(2-ethylhexyl)benzo[1',2'-c:4',5'-c']dithiophene-4,8-dione)]

**O-IDFBR:** (5Z,5'Z)-5,5'-((7,7'-(6,6,12,12-Tetraoctyl-6,12-dihydroindeno[1,2-b]fluorene-2,8-diyl)bis(benzo[c][1,2,5]thiadiazole-7,4-diyl))bis(methanylylidene))bis(3-ethyl-2-thioxothiazolidin-4-one)

**PMI-FF-PMI:** 8,8'-(6,6,12,12-tetraoctyl-6,12-dihydroindeno[1,2-b]fluorene-2,8-yl)-bis(N-(2,6-diisopropylphenyl)-perylene-3,4-dicarboximide)

**IO-4Cl:** 3,9-bis[5,6-dichloro-1H-indene-1,3(2H)-dione]-5,5,11,11-tetrakis(4-hexylphenyl)dithieno[2,3-d:2',3'-d']-s-indaceno[1,2-b:5,6-b']dithiophene

## Section S2: Active layer materials Optical characterization

| Material   | $E_{bg}^k$ (eV)<br>(ellipsometry) | LUMO-HOMO<br>(eV) | Difference | Difference<br>(%) |
|------------|-----------------------------------|-------------------|------------|-------------------|
| D18        | 2.064                             | 1.92              | -0.144     | -6.977            |
| PTQ10      | 2.010                             | 2.56              | 0.550      | 27.363            |
| PM6        | 1.935                             | 1.94              | 0.005      | 0.258             |
| O-IDFBR    | 2.221                             | 2.05              | -0.170     | -7.699            |
| PMI-FF-PMI | 2.127                             | 2.06              | -0.067     | -3.150            |
| IO-4Cl     | 1.888                             | 1.89              | 0.002      | 0.106             |

**Table S1: Energy band gap of materials calculation.** Energy band gap of active layer materials calculated as the inflection point of the extinction coefficient ( $k$ ) measured with ellipsometry ( $E_{bg}^k$ ) compared to the difference between LUMO and HOMO found in literature (shown in Figure 1c). The last two columns correspond to the difference between the two  $E_{bg}$  values in absolute value and in percentual value with respect to the ellipsometric value.

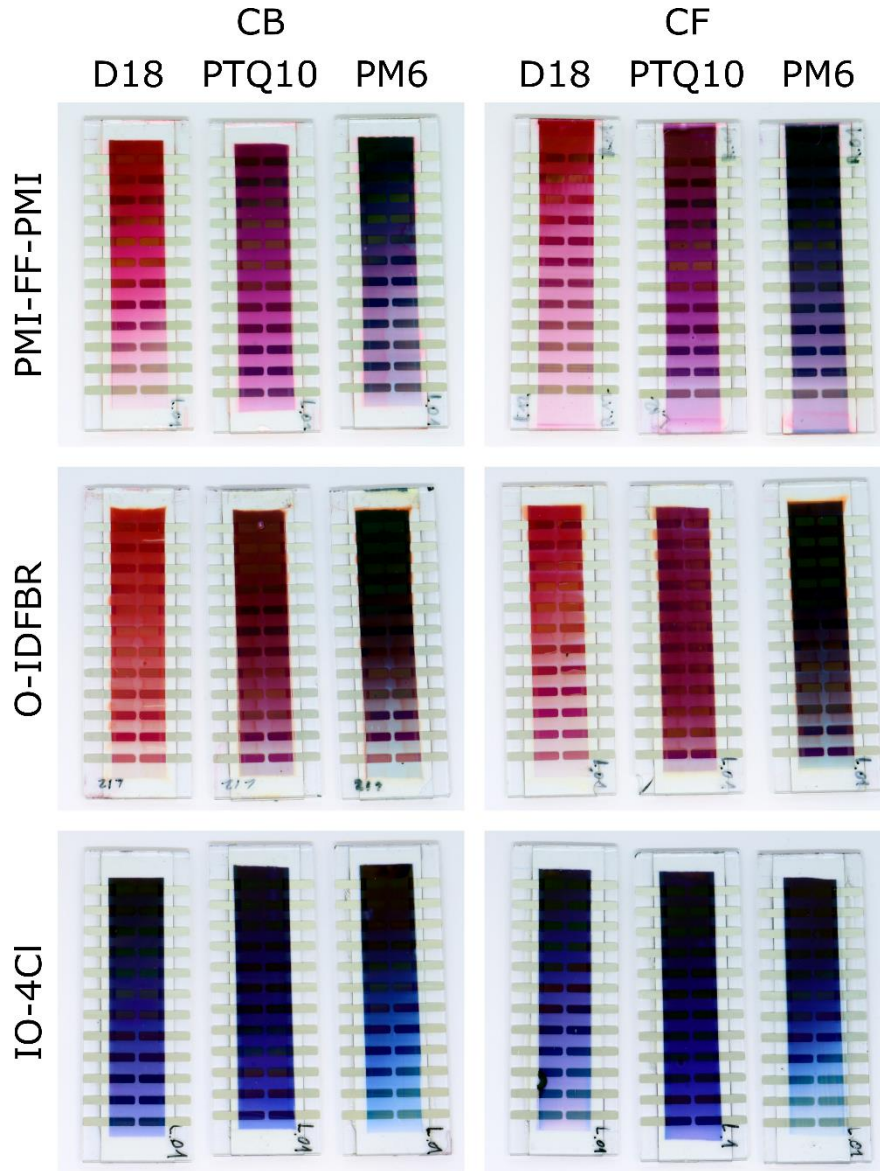

**Figure S1:** Photographs of all 18 samples prepared in the study. The color gradient in each sample corresponds to the thickness gradient of the active layer. The different colors of different active layers denote the different band-gaps and absorption profiles of donors and acceptors used. This is also useful to consider for applications where color tunability is useful (semi-transparent OPV, for example).

### Section S3: Benchmarking

| Ref.             | Active layer |            |         | Device geometry | Coating process | $V_{oc}$ [V] | $J_{sc}$ [mA/cm <sup>2</sup> ] | FF [%] | PCE [%] | Area [cm <sup>2</sup> ] |
|------------------|--------------|------------|---------|-----------------|-----------------|--------------|--------------------------------|--------|---------|-------------------------|
|                  | Donor        | Acceptor   | Solvent |                 |                 |              |                                |        |         |                         |
| 1                | PM6          | IO-4CI     | CB      | Normal          | Spin-coating    | 1.24         | 11.6                           | 68.10  | 9.80    | 1                       |
| 2                | PM6          | IO-4CI     | CB      | Normal          | Spin-coating    | 1.22         | 10.42                          | 61.56  | 7.80    | 0.04                    |
| <b>This work</b> | PM6          | IO-4CI     | CB      | Inverted        | Blade-caoting   | 1.15         | 9.00                           | 58.18  | 6.02    | 0.08                    |
| 3                | D18          | PMI-FF-PMI | CB      | Normal          | Spin-coating    | 1.41         | 6.09                           | 60.9   | 5.34    | 0.1                     |
| <b>This work</b> | D18          | PMI-FF-PMI | CB      | Inverted        | Blade-caoting   | 1.33         | 5.35                           | 49.49  | 3.53    | 0.08                    |

**Table S2:** Comparison between literature work and this work for solar cells made with PM6:IO-4CI and D18:PMI-FF-PMI deposited from CB as active layer materials.

| Donor  | Acceptor    | Solvent | $V_{oc}$ [V] | $J_{sc}$ [mA/cm <sup>2</sup> ] | FF [%]        | PCE [%]     |
|--------|-------------|---------|--------------|--------------------------------|---------------|-------------|
| PTQ10  | O-IDFBR     | CF      | 1.33 (1.32)  | 8.05 (7.39)                    | 50.85 (49.02) | 5.44 (4.79) |
| PTQ10  | O-IDFBR*    | CB      | 1.35 (1.35)  | 9.06 (8.91)                    | 56.05 (54.6)  | 6.87 (6.57) |
| PTQ10  | PMI-FF-PMI  | CF      | 1.38 (1.36)  | 3.63 (3.53)                    | 39.52 (38.85) | 1.98 (1.87) |
| PTQ10  | PMI-FF-PMI  | CB      | 1.36 (1.35)  | 1.70 (1.43)                    | 37.80 (36.95) | 0.87 (0.82) |
| PTQ10* | IO-4Cl*     | CF      | 1.25 (1.24)  | 10.16 (9.79)                   | 57.51 (56.90) | 7.31 (6.88) |
| PTQ10  | IO-4Cl      | CB      | 1.22 (1.19)  | 8.09 (7.78)                    | 56.37 (52.20) | 5.55 (4.84) |
| D18    | O-IDFBR     | CF      | 1.29 (1.24)  | 5.16 (5.17)                    | 47.08 (44.48) | 3.15 (2.84) |
| D18    | O-IDFBR     | CB      | 1.33 (1.33)  | 3.92 (3.81)                    | 50.49 (50.08) | 2.62 (2.54) |
| D18    | PMI-FF-PMI  | CF      | 1.28 (1.19)  | 5.81 (5.42)                    | 42.26 (39.97) | 3.14 (2.58) |
| D18    | PMI-FF-PMI* | CB      | 1.33 (1.31)  | 5.35 (5.42)                    | 49.49 (46.70) | 3.53 (3.31) |
| D18*   | IO-4Cl      | CF      | 1.24 (1.24)  | 8.32 (7.51)                    | 57.13 (56.88) | 5.91 (5.28) |
| D18    | IO-4Cl      | CB      | 1.21 (1.21)  | 8.13 (7.77)                    | 51.85 (53.29) | 5.10 (5.01) |
| PM6    | O-IDFBR     | CF      | 1.23 (1.18)  | 5.93 (5.50)                    | 41.02 (40.79) | 2.99 (2.65) |
| PM6    | O-IDFBR     | CB      | 1.24 (1.22)  | 4.91 (5.00)                    | 48.95 (47.15) | 2.98 (2.87) |
| PM6    | PMI-FF-PMI  | CF      | 1.26 (1.26)  | 2.20 (2.15)                    | 43.07 (43.19) | 1.19 (1.17) |
| PM6    | PMI-FF-PMI  | CB      | 1.26 (1.24)  | 2.48 (2.47)                    | 52.49 (51.81) | 1.64 (1.58) |
| PM6*   | IO-4Cl      | CF      | 1.18 (1.16)  | 9.29 (9.83)                    | 57.03 (54.30) | 6.23 (6.18) |
| PM6    | IO-4Cl      | CB      | 1.15 (1.14)  | 9.00 (9.33)                    | 58.18 (52.07) | 6.02 (5.54) |

**Table S3: Figures-of-merit from J-V measurements for the best performing devices and their thickness pair.** Although the combinatorial screening high throughput method used lead us explore 18 combinations and 12 thickness for each one, the main problem is that we do not obtain enough data to produce statistical analysis of each cell. This table shows the best performing device for each of the 18 combinations and its thickness pair figure-of-merit is shown in brackets.

#### Section S4: $V_{oc}$ dependence on $LUMO_{acceptor}-HOMO_{donor}$

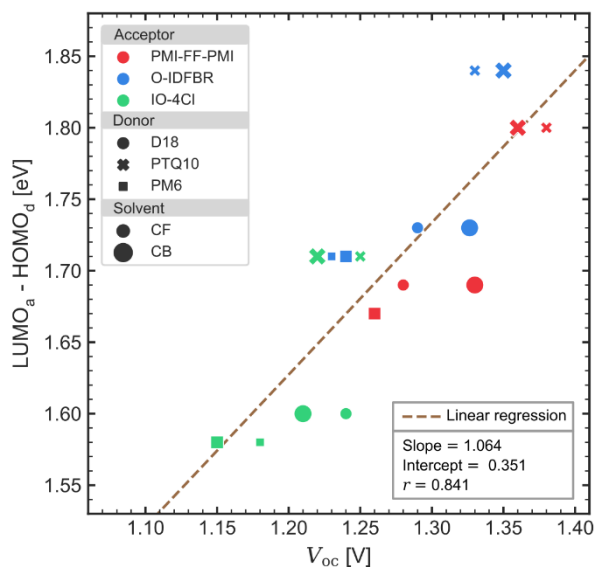

**Figure S2: Energy difference between LUMO of the acceptor and the HOMO of the donor as a function of  $V_{oc}$ .** The data-points fits to a linear regression with a slope of 1.06 suggesting the direct relation between the  $LUMO_{acceptor}-HOMO_{donor}$  difference and the  $V_{oc}$ . The high Pearson's correlation coefficient ( $r = 0.84$ ) is also a sign of the strong correlation between the two parameters.

## Section S5: IO-4Cl batches differences

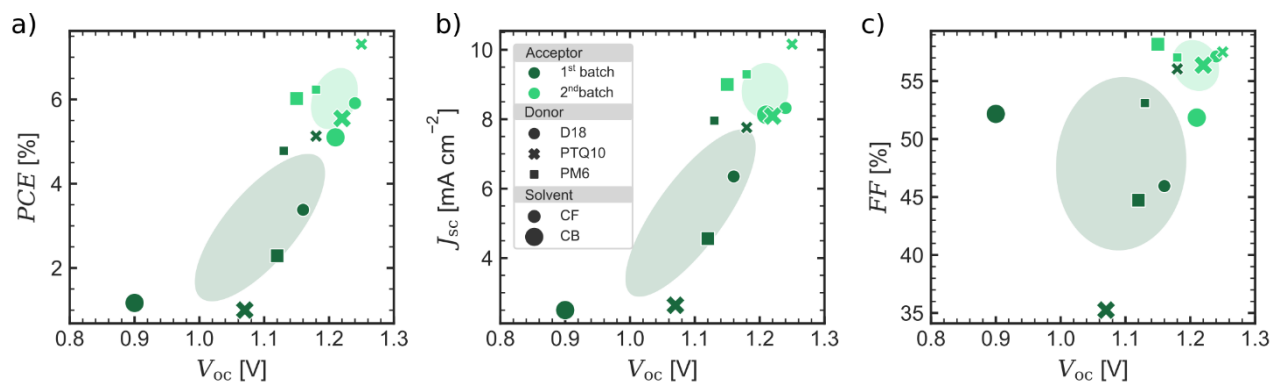

**Figure S3:  $J - V$  measurements results for the two IO-4Cl batches used.** PCE shows that the second IO-4Cl batch (light green) corresponding to the one discussed in the main manuscript, performs much better than the first used batch (dark green). The first batch lacks mainly from  $V_{oc}$  and  $J_{sc}$ . These results highlight the importance of differences from batch to batch at the fabrication of materials for the up-scalability of organic solar cells.

## Section S6: GIWAX measurements

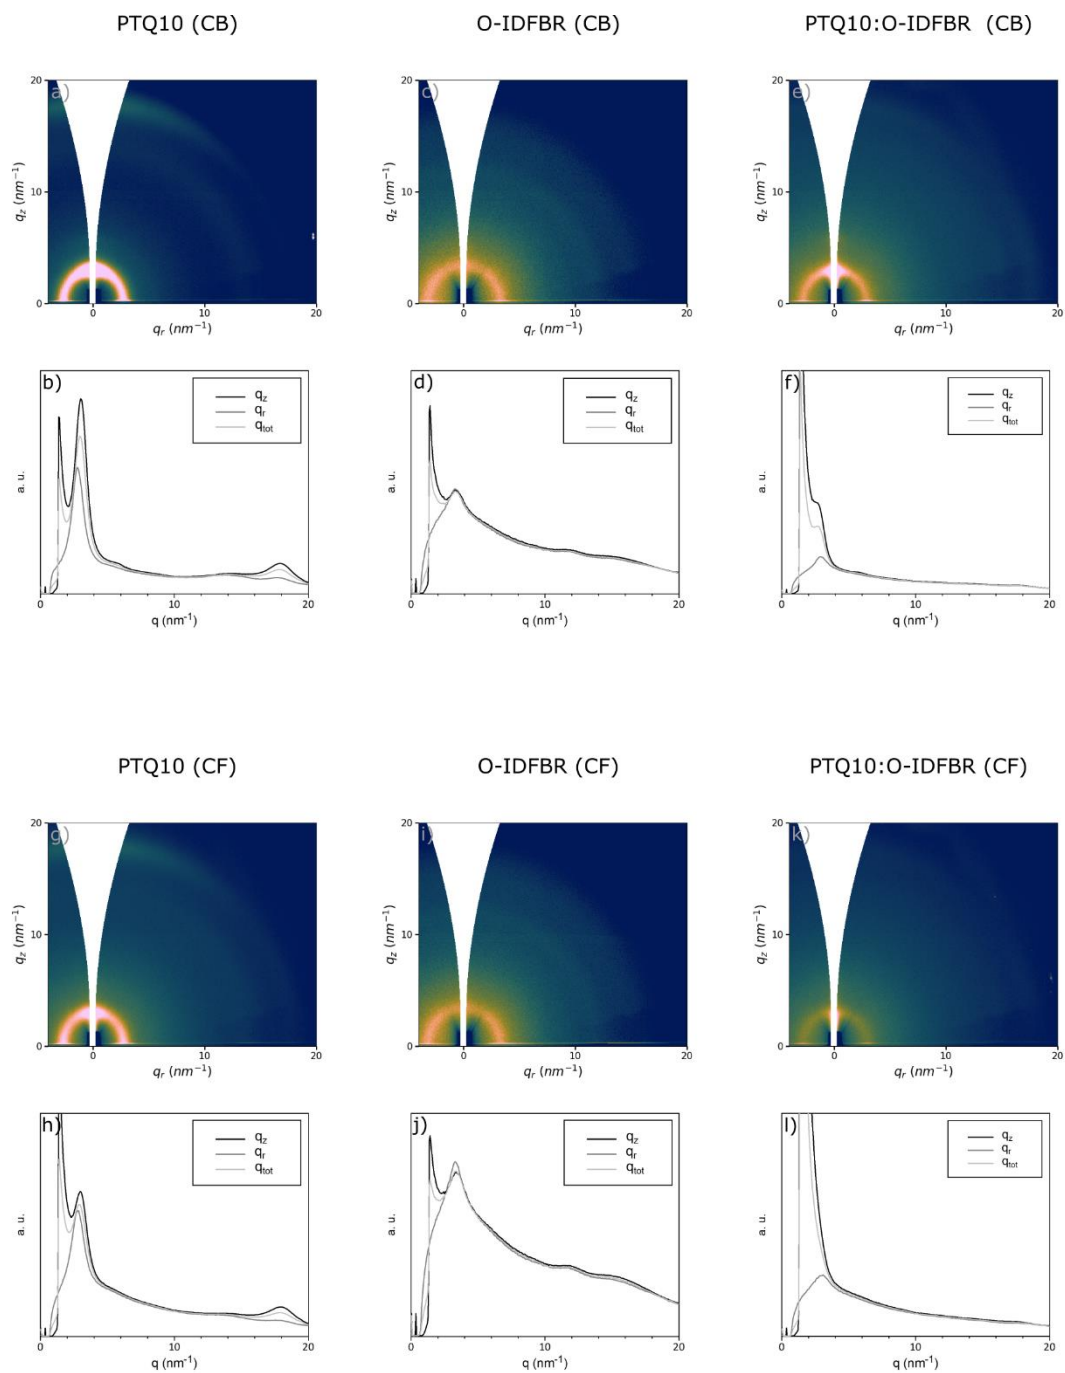

Figure S4: GIWAX data for PTQ10:O-IDFBR deposited from CF and CB.

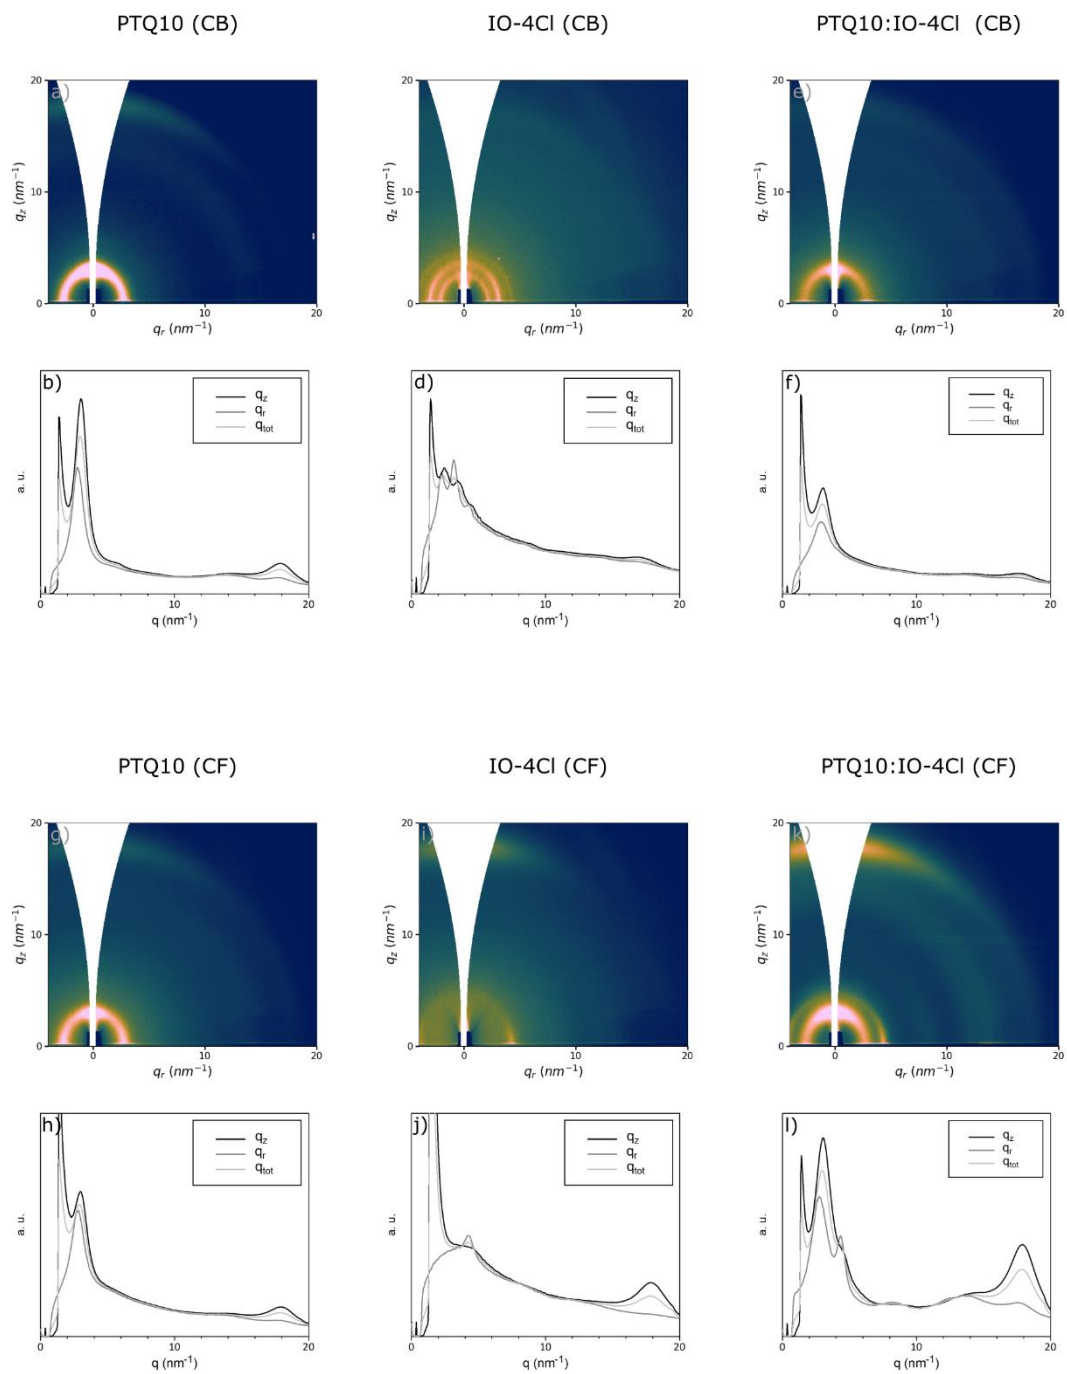

**Figure S5: GIWAX data for PTQ10:IO-4Cl deposited from CF and CB.**

| Sample        | Solvent | $d$  | $L_c$ | $d$  | $L_c$ | $d$   | $L_c$ | $d$  | $L_c$ | $d$  | $L_c$ |
|---------------|---------|------|-------|------|-------|-------|-------|------|-------|------|-------|
|               |         | [nm] | [nm]  | [nm] | [nm]  | [nm]  | [nm]  | [nm] | [nm]  | [nm] | [nm]  |
|               |         | 100  |       | 010  |       | low q |       |      |       |      |       |
| PTQ10         | CB      | 2.25 | 5.79  | 0.35 | 2.46  |       |       |      |       |      |       |
|               | CF      | 2.24 | 5.48  | 0.35 | 2.49  |       |       |      |       |      |       |
| O-IDFBR       | CB      |      |       |      |       | 1.90  | 6.44  |      |       |      |       |
|               | CF      |      |       |      |       | 1.89  | 6.45  |      |       |      |       |
| PTQ10:O-IDFBR | CB      | 2.13 | 5.76  | 0.36 | 1.99  |       |       |      |       |      |       |
|               | CF      | 2.09 | 4.46  | -    | -     |       |       |      |       |      |       |
| O-4Cl         | CB      |      |       | 0.38 | 6.13  | 2.78  | 20.44 | 1.99 | 8.87  | 1.49 | 4.88  |
|               | CF      |      |       | 0.35 | 3.25  |       |       |      |       | 1.49 | 10.91 |
| PTQ10:O-4Cl   | CB      | 2.15 | 5.15  | 0.36 | 4.78  |       |       |      |       |      |       |
|               | CF      | 2.07 | 5.76  | 0.35 | 3.07  |       |       |      |       | 1.46 | 14.82 |

**Table S4: 100 plane, 010 plane and low q region d-spacing ( $d$ ) and coherence length ( $L_c$ ) analysis.**

The d-spacing ( $d$ ) and the coherence length ( $L_c$ ) were collected for all the samples from the 1D integrations of the GIWAXS diffractograms. Data were reported accounting for lamellar stacking of the polymer donor (100 planes) and other contributions, such as  $\pi$ - $\pi$  stacking (010) as well as characteristic peaks from the acceptors at lower q values.

Compared with the pure donor, the 100 planes of the blends seem to shift towards lower  $d$  values. Nevertheless, no direct correlation of such information with structural changes can be directly pointed out, as a contribution from the acceptor at lower q can alter the peak position, making it hard to give reliable assessments.



## Section S6: FF vs. $V_{oc}$

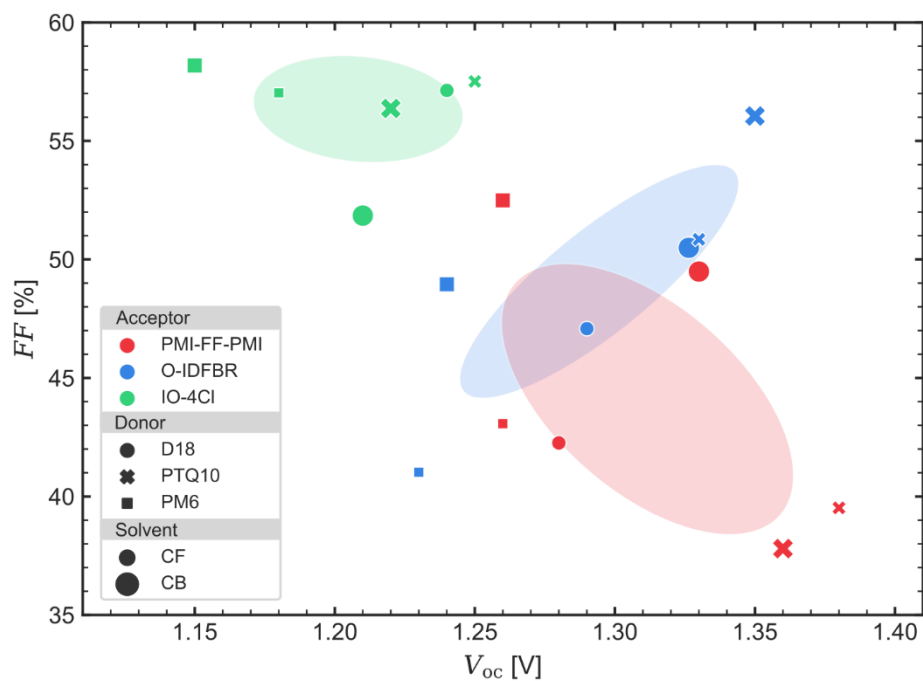

**Figure S6: FF vs.  $V_{oc}$  for the 18 best devices.** The FF varies in a lower range compared to  $J_{sc}$  which is why it does not have such an important impact in the final PCE as the  $J_{sc}$  has. There is no clear correlation between FF and  $V_{oc}$  since the  $1\sigma$  ellipses show that for IO-4Cl the correlation is negligible and for PMI-FF-PMI and O-IDFBR the correlation is negative and positive respectively.

## Section S7: $V_{oc}$ losses calculations

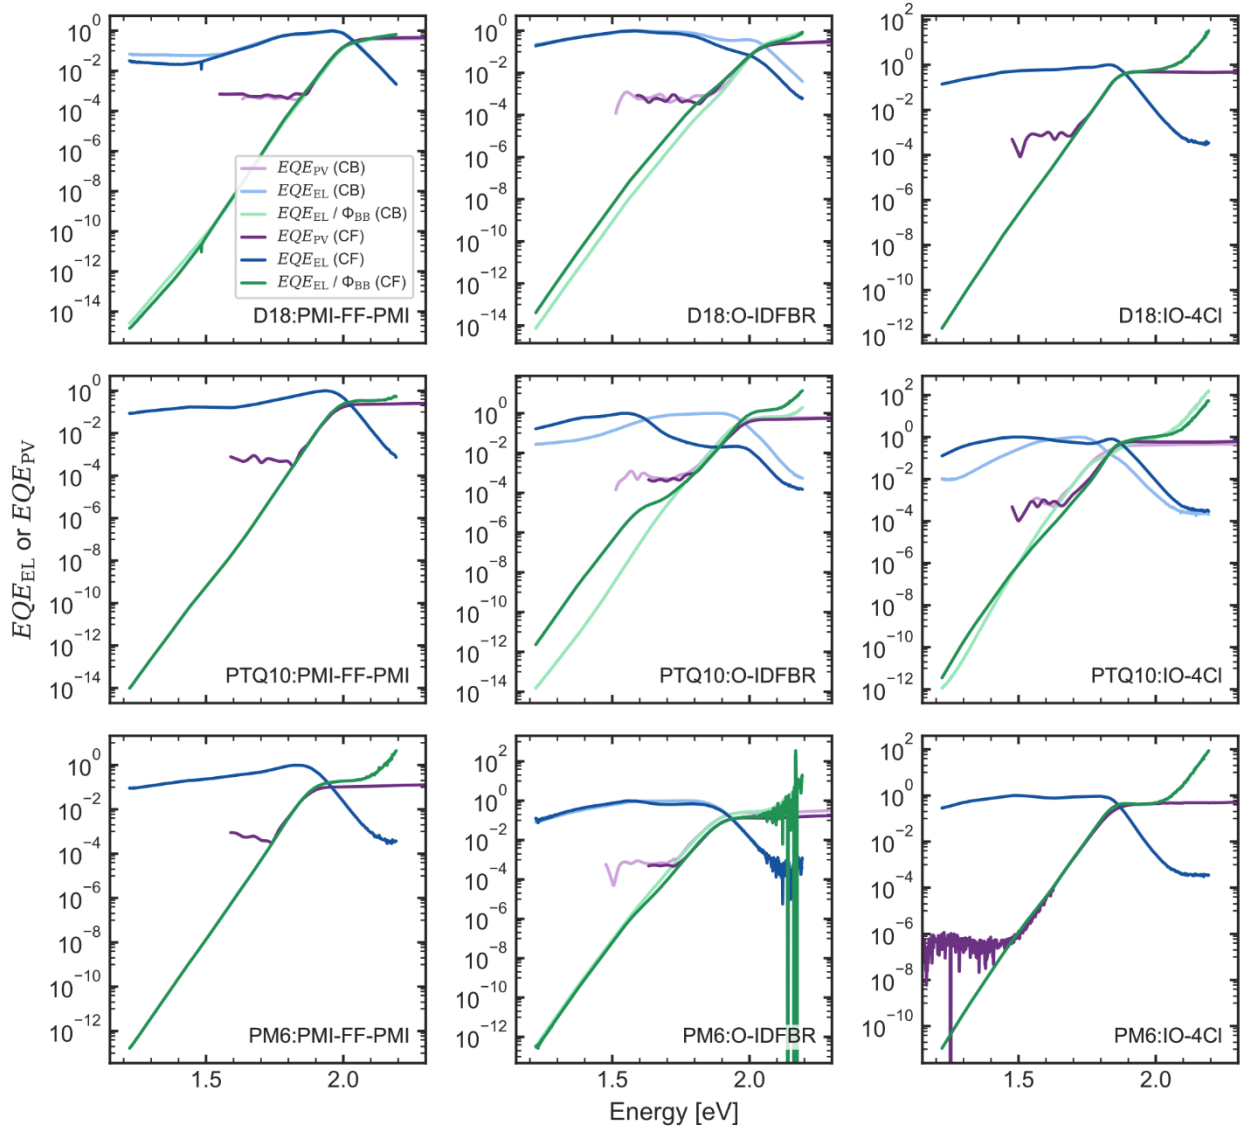

**Figure S5: EL fits for extend the  $EQE_{PV}$  for  $V_{oc}$  losses calculations.** The EL spectrum divided by the BB spectrum (green) is fitted to the  $EQE_{PV}$  (purple) in low energy  $EQE_{PV}$  region where the  $EQE_{PV}$  edge shows a slope in a logarithmic scale. The plots also show the EL resulting from the fitted spectrum (blue). The light and dark colors stand for CF and CB respectively. The data from the blends D18:IO-4CI, PTQ10:PMI-FF-PMI, PM6:PMI-FF-PMI and PM6:IO-4CI prepared by CB is missing because they were not measured.

In order to properly calculate  $V_{oc}$  voltage losses one needs the photovoltaic external quantum efficiency ( $EQE_{PV}$ ) in a large spectral and dynamic range. The standard  $EQE_{PV}$  characterization (which was done in this work) comprising an arc-lamp light source and a monochromator is not enough for a proper characterization of  $V_{oc}$  losses. According to Rau,<sup>4</sup>  $EQE_{PV}$  of a solar cell is equivalent to the quotient between the electroluminescence quantum efficiency ( $EQE_{EL}$ ) and the black body spectrum ( $\phi_{BB}$ ).  $EQE_{EL}$  is understood as the spectral distribution of the photons emitted by the cell when a current is applied to it. Its integral over the spectrum has to account for the total number of emitted photons per injected electron (expressed in %). This measure is difficult to perform due to the challenge of collecting all emitted photons because their emission is generally omnidirectional. Nevertheless, assuming that the spectral shape is homogeneous in all directions and taking advantage of the relation between  $EQE_{EL}$  and  $EQE_{PV}$ , we can

assess  $EQE_{EL}$  by measuring the EL spectrum ( $\phi_{EL}$ ) and the  $EQE_{PV}$ . This is done by assuming that  $EQE_{EL} = a \cdot \phi_{EL}$ , where  $a$  is a factor that is fitted to the relation between  $EQE_{PV}$  and  $EQE_{EL}$ :

$$EQE_{PV} = \frac{EQE_{EL}}{\phi_{BB}} = \frac{a \cdot \phi_{EL}}{\phi_{BB}}$$

Figure S5 shows the  $EQE_{EL}$  (in blue) as well as the  $EQE_{PV}$  and the  $EQE_{EL}/\phi_{BB}$ . The fitting of the factor  $a$  is done in the range where  $EQE_{PV}$  and  $\phi_{EL}$  overlap which is around the energy band gap of the material. The final extended  $EQE_{PV}$  used for the  $V_{oc}$  analysis is taken as  $EQE_{EL}/\phi_{BB}$  for energies below the fit range, the measured  $EQE_{PV}$  for energies above the fit range and the average between  $EQE_{EL}/\phi_{BB}$  and  $EQE_{PV}$  inside the fit range.

| Active layer materials |            |         | $J - V$ curve                                | $V_{oc}^r$ calculations           |                                |                   |
|------------------------|------------|---------|----------------------------------------------|-----------------------------------|--------------------------------|-------------------|
| Donor                  | Acceptor   | Solvent | $J_{sc}^{measured}$<br>[mA/cm <sup>2</sup> ] | $J_{sc}$<br>[mA/cm <sup>2</sup> ] | $J_0$<br>[mA/cm <sup>2</sup> ] | $V_{oc}^r$<br>[V] |
| D18                    | PMI-FF-PMI | CB      | 4.95                                         | 4.94                              | $7.60 \times 10^{-28}$         | 1.66              |
| D18                    | PMI-FF-PMI | CF      | 5.05                                         | 5.59                              | $8.92 \times 10^{-28}$         | 1.65              |
| D18                    | O-IDFBR    | CB      | 3.85                                         | 3.34                              | $1.25 \times 10^{-27}$         | 1.63              |
| D18                    | O-IDFBR    | CF      | 4.48                                         | 3.76                              | $6.46 \times 10^{-27}$         | 1.59              |
| D18                    | IO-4Cl     | CF      | 8.32                                         | 7.65                              | $3.95 \times 10^{-25}$         | 1.51              |
| PTQ10                  | PMI-FF-PMI | CF      | 3.44                                         | 3.12                              | $2.14 \times 10^{-27}$         | 1.62              |
| PTQ10                  | O-IDFBR    | CB      | 9.06                                         | 8.31                              | $1.37 \times 10^{-26}$         | 1.59              |
| PTQ10                  | O-IDFBR    | CF      | 7.97                                         | 7.27                              | $2.68 \times 10^{-25}$         | 1.51              |
| PTQ10                  | IO-4Cl     | CB      | 7.47                                         | 7.62                              | $2.01 \times 10^{-24}$         | 1.46              |
| PTQ10                  | IO-4Cl     | CF      | 10.53                                        | 10.16                             | $8.80 \times 10^{-25}$         | 1.49              |
| PM6                    | PMI-FF-PMI | CF      | 2.16                                         | 1.94                              | $3.63 \times 10^{-26}$         | 1.53              |
| PM6                    | O-IDFBR    | CB      | 5.00                                         | 4.43                              | $1.35 \times 10^{-25}$         | 1.52              |
| PM6                    | O-IDFBR    | CF      | 5.93                                         | 2.38                              | $7.37 \times 10^{-26}$         | 1.52              |
| PM6                    | IO-4Cl     | CF      | 9.83                                         | 7.05                              | $1.32 \times 10^{-24}$         | 1.47              |

**Table S5: Results from  $V_{oc}$  losses measurements and calculations.**

| Active layer materials |            |         | $V_{oc}$ values |                   |                      |                  | $V_{oc}$ losses             |                          |                             |                                |
|------------------------|------------|---------|-----------------|-------------------|----------------------|------------------|-----------------------------|--------------------------|-----------------------------|--------------------------------|
| Donor                  | Acceptor   | Solvent | $V_{oc}$<br>[V] | $V_{oc}^r$<br>[V] | $V_{oc}^{SQ}$<br>[V] | $E_{ba}$<br>[eV] | $\Delta V_{oc}^{nr}$<br>[V] | $\Delta V_{oc}^r$<br>[V] | $\Delta V_{oc}^{sc}$<br>[V] | $\Delta V_{oc}^{total}$<br>[V] |
| D18                    | PMI-FF-PMI | CB      | 1.28            | 1.66              | 1.71                 | 2.01             | 0.38                        | 0.02                     | 0.03                        | 0.73                           |
| D18                    | PMI-FF-PMI | CF      | 1.36            | 1.65              | 1.71                 | 2.01             | 0.29                        | 0.03                     | 0.02                        | 0.65                           |
| D18                    | O-IDFBR    | CB      | 1.33            | 1.63              | 1.72                 | 2.02             | 0.30                        | 0.05                     | 0.04                        | 0.69                           |
| D18                    | O-IDFBR    | CF      | 1.31            | 1.59              | 1.74                 | 2.04             | 0.28                        | 0.11                     | 0.03                        | 0.73                           |
| D18                    | IO-4Cl     | CF      | 1.24            | 1.51              | 1.57                 | 1.86             | 0.27                        | 0.04                     | 0.02                        | 0.62                           |
| PTQ10                  | PMI-FF-PMI | CF      | 1.38            | 1.62              | 1.68                 | 1.98             | 0.24                        | 0.02                     | 0.04                        | 0.60                           |
| PTQ10                  | O-IDFBR    | CB      | 1.35            | 1.59              | 1.65                 | 1.95             | 0.24                        | 0.04                     | 0.02                        | 0.60                           |
| PTQ10                  | O-IDFBR    | CF      | 1.34            | 1.51              | 1.68                 | 1.98             | 0.17                        | 0.15                     | 0.02                        | 0.64                           |
| PTQ10                  | IO-4Cl     | CB      | 1.19            | 1.46              | 1.54                 | 1.83             | 0.27                        | 0.05                     | 0.02                        | 0.64                           |
| PTQ10                  | IO-4Cl     | CF      | 1.25            | 1.49              | 1.55                 | 1.84             | 0.24                        | 0.04                     | 0.02                        | 0.59                           |
| PM6                    | PMI-FF-PMI | CF      | 1.25            | 1.53              | 1.60                 | 1.89             | 0.28                        | 0.01                     | 0.06                        | 0.64                           |
| PM6                    | O-IDFBR    | CB      | 1.19            | 1.52              | 1.60                 | 1.89             | 0.33                        | 0.04                     | 0.04                        | 0.70                           |
| PM6                    | O-IDFBR    | CF      | 1.22            | 1.52              | 1.60                 | 1.89             | 0.30                        | 0.03                     | 0.05                        | 0.67                           |
| PM6                    | IO-4Cl     | CF      | 1.16            | 1.47              | 1.55                 | 1.84             | 0.31                        | 0.05                     | 0.02                        | 0.68                           |

**Table S6:  $V_{oc}$  losses analysis results.** The  $V_{oc}$  values are the different  $V_{oc}$  calculated following the procedure on the main text of the article. The difference between them ( $V_{oc}$  increments) correspond to the different voltage losses associated to non-radiative ( $\Delta V_{oc}^{nr}$ ), radiative ( $\Delta V_{oc}^r$ ), and due to  $J_{sc}$  difference ( $\Delta V_{oc}^{sc}$ ). The total voltage loss is also shown ( $\Delta V_{oc}^{total}$ ).

## Section S9: LED references table

| Kind            | Active layer materials                          | Intensity [lux] | $V_{oc}$ [V] | $J_{sc}$ [ $\mu A/cm^2$ ] | $FF$ [%] | $PCE$ [%] | Ref.      |
|-----------------|-------------------------------------------------|-----------------|--------------|---------------------------|----------|-----------|-----------|
| Fullerene       | PTB7-Th/PC <sub>71</sub> BM                     | 186             | 0.56         | 19                        | 72       | 10.55     | 5         |
| Fullerene       | PTB7-Th/PC <sub>71</sub> BM                     | 890             | 0.62         | 92                        | 74       | 11.63     | 5         |
| Fullerene       | PDTBTBz-2F <sub>anti</sub> :PC <sub>71</sub> BM | 1000            | 0.82         | 112.4                     | 70.4     | 23.1      | 6         |
| Fullerene       | P3HT:PC <sub>71</sub> BM                        | 1000            | 0.5          | 73.7                      | 71.9     | 9.4       | 6         |
| Fullerene       | PBDB-T:PC <sub>71</sub> BM                      | 1000            | 0.67         | 90.2                      | 71.3     | 15.3      | 6         |
| Fullerene       | PTB7:PC <sub>71</sub> BM                        | 1000            | 0.57         | 87.6                      | 69.3     | 12.3      | 6         |
| Fullerene       | WF3:PC <sub>71</sub> BM                         | 500             | 0.57         | 58.3                      | 64.2     | 12.83     | 7         |
| Fullerene       | WF3S:PC <sub>71</sub> BM                        | 500             | 0.61         | 60.4                      | 65.7     | 14.32     | 7         |
| Fullerene       | WF3F:PC <sub>71</sub> BM                        | 500             | 0.69         | 63.6                      | 67.4     | 17.34     | 7         |
| Fullerene       | P1:PC <sub>71</sub> BM (100 nm)                 | 300             | 0.76         | 29.6                      | 66.1     | 19.15     | 8         |
| Fullerene       | P1:PC <sub>71</sub> BM (200 nm)                 | 300             | 0.76         | 28.2                      | 67.2     | 18.43     | 8         |
| Fullerene       | P3HT:PC <sub>61</sub> BM                        | 500             | 0.43         | 62                        | 59       | 8.9       | 9         |
| Fullerene       | P3HT:ICBA                                       | 500             | 0.73         | 50                        | 63       | 13.05     | 9         |
| Fullerene       | PTB7:PNP                                        | 200             | 0.57         | 19                        | 67       | 9.5       | 10        |
| Fullerene       | BDT-2T-ID:PNP                                   | 200             | 0.75         | 24.2                      | 68       | 16        | 10        |
| Fullerene       | BDT-1T-ID:PNP                                   | 200             | 0.84         | 19.2                      | 59       | 12.4      | 10        |
| Fullerene       | 1DTP-1D:PNP                                     | 200             | 0.69         | 26.4                      | 68       | 17.7      | 11        |
| Fullerene       | 2DTP-1D:PNP                                     | 200             | 0.71         | 22.4                      | 61       | 13.8      | 11        |
| Fullerene       | PCDTBT:PC <sub>71</sub> BM                      | 300             | 0.7          | 31.2                      | 56.6     | 16        | 12        |
| Fullerene       | PTB7:PC <sub>71</sub> BM                        | 500             | 0.6          | 46                        | 54.3     | 8.9       | 12        |
| NFA             | PPDT2FBT:ITIC-M                                 | 300             | 0.53         | 20.8                      | 57       | 6.9       | 13        |
| NFA             | PPDT2FBT:ITIC-M                                 | 1000            | 0.62         | 68.5                      | 54.6     | 7.5       | 13        |
| NFA             | PPDT2FBT:ITIC-F                                 | 300             | 0.29         | 34.8                      | 31.3     | 3.5       | 13        |
| NFA             | PPDT2FBT:ITIC-F                                 | 1000            | 0.45         | 85.5                      | 37.6     | 4.7       | 13        |
| NFA             | PPDT2FBT:tPDI <sub>2</sub> N-EH                 | 300             | 0.79         | 20.9                      | 49.9     | 9         | 13        |
| NFA             | PPDT2FBT:tPDI <sub>2</sub> N-EH                 | 1000            | 0.84         | 65.4                      | 50.2     | 8.9       | 13        |
| NFA             | CD1:ITIC                                        | 1000            | 0.77         | 107                       | 67.5     | 15.4      | 13        |
| NFA             | CD1:PBN-10                                      | 1000            | 1.14         | 105                       | 65.4     | 21.7      | 13        |
| NFA             | PBDB-TF:IO-4Cl (1cm <sup>2</sup> )              | 200             | 1.03         | 18.2                      | 71.5     | 22.2      | 1         |
| NFA             | PBDB-TF:IO-4Cl (1 cm <sup>2</sup> )             | 1000            | 1.1          | 90.6                      | 79.1     | 26.1      | 1         |
| NFA             | PBDB-TF:ITCC                                    | 1000            | 0.962        | 95.8                      | 72.2     | 22        | 14        |
| NFA             | PBDB-TF:IT-4F                                   | 1000            | 0.712        | 113                       | 78.0     | 20.8      | 14        |
| NFA             | PBDB-TF:IT-M                                    | 500             | 0.88         | 54.2                      | 75.4     | 22.8      | 15        |
| NFA             | PM6:Y6-O                                        | 1650            | 0.84         | 245                       | 76       | 30.9      | 16        |
| NFA             | P3TEA: FTTB-PDI4                                | 1650            | 1.02         | 192                       | 67       | 26.7      | 16        |
| NFA             | PM6:Y6                                          | 1000            | 0.72         | 146.6                     | 77       | 36.5      | 17        |
| NFA (This work) | PTQ10:O-IDFBR                                   | 560             | 1.21         | 57.7                      | 58.5     | 22.6      | This work |
| Multicomponent  | PCDTBT:PDTSTPD:PC <sub>71</sub> BM              | 300             | 0.72         | 31.4                      | 62.1     | 18.1      | 12        |
| Multicomponent  | PTB7:PC <sub>71</sub> BM:EP-PDI                 | 500             | 0.65         | 57                        | 68.5     | 15.4      | 18        |
| Multicomponent  | PTB7-Th:PBDB-T:ITIC-Th:PC <sub>71</sub> BM      | 1000            | 0.68         | 102.3                     | 57.5     | 14.3      | 19        |
| Multicomponent  | PTB7-Th:PBDB-T:PC <sub>71</sub> BM:ITIC-Th      | 500             | 0.63         | 43.7                      | 64.6     | 10.5      | 20        |
| Multicomponent  | PTB7-Th:PBDB-T:PC <sub>71</sub> BM:ITIC-Th      | 1000            | 0.67         | 99.2                      | 64.8     | 15.5      | 20        |
| Multicomponent  | PBDB-T:ITIC-Th:PC <sub>71</sub> BM              | 1000            | 0.72         | 157                       | 65.1     | 26.4      | 21        |
| Multicomponent  | PBDB-TF:Y6: Y-Th2                               | 1000            | 0.701        | 320.1                     | 74.48    | 22.7      | 22        |
| Multicomponent  | PM6:ITIC-Th:IT-4F                               | 500             | 0.75         | 74.73                     | 77.1     | 30.11     | 23        |

Table S7: References of the indoor literature comparison from Figure 6 c).

## Section S10: Indoor LED spectrum CCT

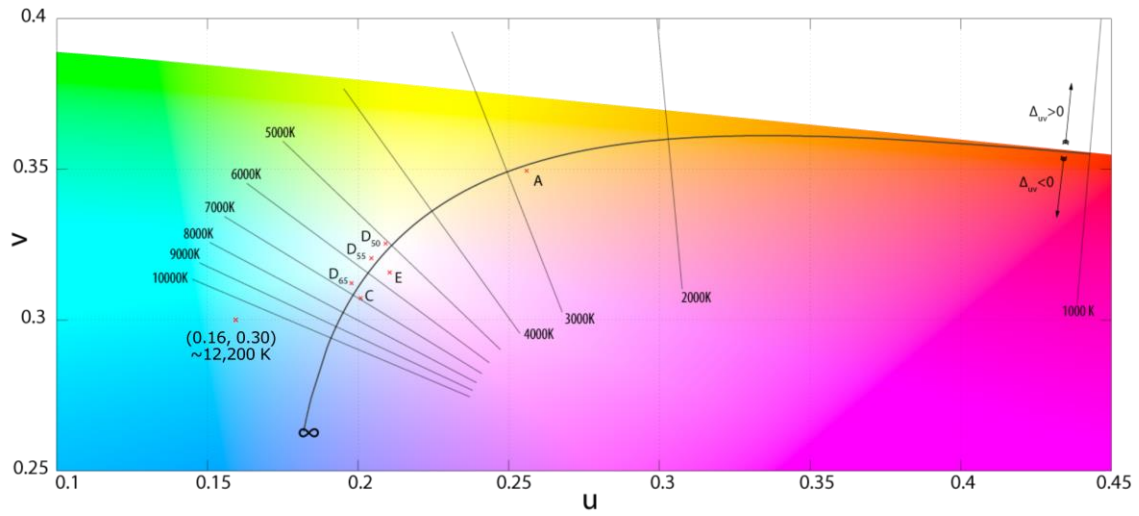

**Figure S8: Color space representation for the indoor spectrum used.** CIE 1960 UCS color space where the Planckian locus is plotted (curved black line) from infinite to 10,000K temperature. Different temperature perpendicular lines are shown within  $\Delta_{uv} = \pm 0.05$  that CIE considers the correlated color temperature (CCT) to be meaningful. Different reference spectra are positioned in the color space, as well as the LED spectrum used in this study, which has a  $(u, v)$  coordinates of  $(0.16, 0.30)$  corresponding to a CCT of 12,200 K. The  $\Delta_{uv}$  is 0.031, therefore being inside the meaningful range of the CCT calculation as considered for CIE.

## Section S11: Indoor shunt resistance ( $R_{sh}$ ) evaluation

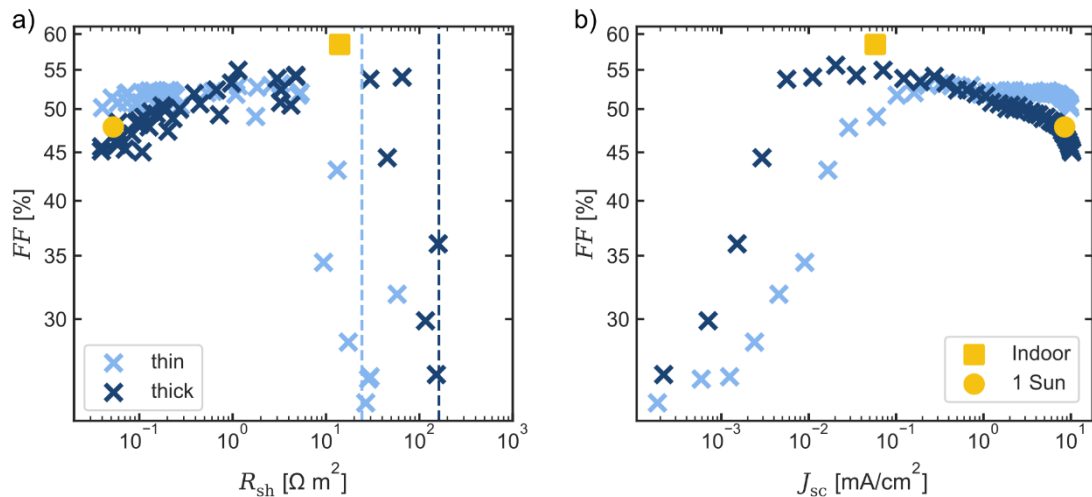

**Figure S9: Evaluation PTQ10:O-IDFBR leakage with light-intensity dependent measurements.** (a) Fill factor ( $FF$ ) plotted against shunt resistance ( $R_{sh}$ ) for a thin (light blue crosses) and a thick (dark blue crosses) measured at different light intensities during a red sweep using the custom Spectrum On demand Light Source (SOLS) from ref. 25. Dashed vertical lines correspond to the  $R_{sh}$  of both cells measured in dark ( $R_{sh,d}$ ). (b)  $FF$  vs.  $J_{sc}$  for the same data set. The yellow square in (a) and (b) corresponds to the data point of the solar cell measured under indoor conditions in the manuscript (figure 5). The yellow circle in (a) and (b) corresponds to the same cell measured under 1 Sun.

Fill factor ( $FF$ ) takes an important role in indoor light harvesting for OPV technology. In general, this is due to the inherent better charge dissociation for lower luminosities. At light intensities close to 1 sun, the main limiting factor is the series resistance ( $R_s$ ). The effect of the latter decreases as light intensity, and so does photocurrent, decreases. This produces an increase in  $FF$  as light intensity decreases. On the opposite, at low intensities (close to indoor conditions) the performance of the solar cell is limited by leakage current, i.e. shunt resistance ( $R_{sh}$ ).<sup>24</sup> This happens because, at low intensities, the photocurrent gets comparable to the leakage current. The limit when the  $J$ - $V$  curve becomes a line without rectifying is when  $R_{sh}$  is approaching the shunt resistance at dark ( $R_{sh,d}$ ).

We have measured  $J$ - $V$  curves of two PTQ10:O-IDFBR at different light intensities in a wide dynamic range. The latter was done with a custom made equipment named spectrum on demand light source (SOLS). The data points are the result of a red sweep measurement. For more information you can check the corresponding publication of the SOLS.<sup>25</sup> It means that different light intensities were achieved by blocking the blue part of the solar spectrum maintaining the red fraction constant. This implies that the spectrum at each data point does not have the same shape. Nevertheless, assuming that the generated charges thermalize before they are extracted, the shape variance of the spectrum is not an issue. Therefore, as a first approximation  $J_{sc}$  is the parameter analogous to the light intensity when the latter is maintained with a constant spectral shape. Figure S9 (a) shows the  $FF$  vs.  $R_{sh}$  for the red sweep of two PTQ10:O-IDFBR cells with different thicknesses (blue data crosses). The vertical lines show the  $R_{sh,d}$  for both devices. As expected, the thicker device (dark blue) has a higher  $R_{sh,d}$  due to lower leakage current. The latter results in a  $FF$  higher than the thin device (light blue) at lower intensities. On the opposite, at high intensities, the thin cell exhibits a higher  $FF$  due to its lower series resistance produced by a thinner active layer. The yellow square and round data points corresponds to the solar cell characterized in indoor conditions in the manuscript for indoor illumination and 1 sun illumination, respectively. This cell at 1 sun has a  $FF$  in between the other two cells. Therefore, at indoor conditions we expect this cell to behave in between the blue data points, with a  $R_{sh,d}$  in the middle. The corresponding square yellow data point is inside the expected trend exhibiting a high  $FF$  at  $R_{sh}$  just below the of  $R_{sh,d}$  of the thinner device.

Similarly, Figure S9 (b) shows the  $FF$  vs.  $J_{sc}$  for the same red sweep measurements. The tendency is the expected since the thicker device (dark blue) exhibit a higher  $FF$  at low  $J_{sc}$  (i.e. low luminosity) while the thinner (light blue) shows higher  $FF$  at the  $J_{sc}$  region near 1-sun illumination. As happens in Figure S9 (a), the yellow datapoints, corresponding to the cell measured at indoor for indoor illumination (yellow square) and 1 sun illumination (yellow circle) are also in between the other two cells.

## S.I. References

- 1 Y. Cui, Y. Wang, J. Bergqvist, H. Yao, Y. Xu, B. Gao, C. Yang, S. Zhang, O. Inganäs, F. Gao and J. Hou, *Nat Energy*, 2019, **4**, 768–775.
- 2 Y. Yang, C. Xue, H. Yin, Z. Chen and X. T. Hao, *Cell Rep Phys Sci*, 2022, **3**, 100861.
- 3 J. Hofinger, S. Weber, F. Mayr, A. Jodlbauer, M. Reinfelds, T. Rath, G. Trimmel and M. C. Scharber, *J Mater Chem A Mater*, 2022, **10**, 2888–2906.
- 4 U. Rau, *Phys Rev B Condens Matter Mater Phys*, 2007, **76**, 085303.
- 5 S. Mori, T. Gotanda, Y. Nakano, M. Saito, K. Todoriki and M. Hosoya, *Jpn J Appl Phys*, 2015, **54**, 071602.
- 6 Y. J. You, C. E. Song, Q. V. Hoang, Y. Kang, J. S. Goo, D. H. Ko, J. J. Lee, W. S. Shin and J. W. Shim, *Adv Funct Mater*, 2019, **29**, 1901171.
- 7 R. Singh, C. L. Chochos, V. G. Gregoriou, A. D. Nega, M. Kim, M. Kumar, S. C. Shin, S. H. Kim, J. W. Shim and J. J. Lee, *ACS Appl Mater Interfaces*, 2019, **11**, 36905–36916.
- 8 H. Yin, S. Chen, S. H. Cheung, H. W. Li, Y. Xie, S. W. Tsang, X. Zhu and S. K. So, *J Mater Chem C Mater*, 2018, **6**, 9111–9118.
- 9 S. S. Yang, Z. C. Hsieh, M. L. Keshtov, G. D. Sharma and F. C. Chen, *Solar RRL*, 2017, **1**, 1700174.
- 10 R. Arai, S. Furukawa, Y. Hidaka, H. Komiyama and T. Yasuda, *ACS Appl Mater Interfaces*, 2019, **11**, 9259–9264.
- 11 R. Arai, S. Furukawa, N. Sato and T. Yasuda, *J Mater Chem A Mater*, 2019, **7**, 20187–20192.
- 12 H. Yin, J. K. W. Ho, S. H. Cheung, R. J. Yan, K. L. Chiu, X. Hao and S. K. So, *J Mater Chem A Mater*, 2018, **6**, 8579–8585.
- 13 S. V. Dayneko, M. Pahlevani and G. C. Welch, *ACS Appl Mater Interfaces*, 2019, **11**, 46017–46025.
- 14 Y. Cui, H. Yao, T. Zhang, L. Hong, B. Gao, K. Xian, J. Qin, J. Hou, Y. Cui, H. Yao, T. Zhang, L. Hong, B. Gao, K. Xian, J. Qin and J. Hou, *Advanced Materials*, 2019, **31**, 1904512.
- 15 V. Shrotriya, G. Li, Y. Yao, T. Moriarty, K. Emery and Y. Yang, *Adv Funct Mater*, 2006, **16**, 2016–2023.
- 16 L.-K. Ma, Y. Chen, P. C. Y. Chow, G. Zhang, J. Huang, C. Ma, J. Zhang, H. Yin, A. M. Hong Cheung, K. S. Wong, S. K. So and H. Yan, *Joule*, 2020, **4**, 1486–1500.
- 17 C. Lee, J. Lee, H. H. Lee, M. Nam and D. Ko, *Adv Energy Mater*, , DOI:10.1002/aenm.202200275.
- 18 R. Singh, S. C. Shin, H. Lee, M. Kim, J. W. Shim, K. Cho and J. J. Lee, *Chemistry – A European Journal*, 2019, **25**, 6154–6161.
- 19 M. Nam, H. Yeon Noh, J. Cho, Y. Park, S.-C. Shin, J.-A. Kim, J. Kim, H. Hwi Lee, J. Won Shim, D.-H. Ko, M. Nam, H. Y. Noh, J. Cho, Y. Park, J. Kim, D. Ko, S. Shin, J. W. Shim, J. Kim and H. H. Lee, *Adv Funct Mater*, 2019, **29**, 1900154.



- 20 M. Nam, H. Y. Noh, J. H. Kang, J. Cho, B. K. Min, J. W. Shim and D. H. Ko, *Nano Energy*, 2019, **58**, 652–659.
- 21 M. Nam, J. Kang, J. Shin, J. Na, Y. Park, J. Cho, B. Kim, H. Hwi Lee, R. Chang, D.-H. Ko, M. Nam, J. Kang, J. Shin, J. Cho, B. Kim, D. Ko, J. Na, Y. Park, R. Chang and H. H. Lee, *Adv Energy Mater*, 2019, **9**, 1901856.
- 22 Y. Cho, T. Kumari, S. Jeong, S. M. Lee, M. Jeong, B. Lee, J. Oh, Y. Zhang, B. Huang, L. Chen and C. Yang, *Nano Energy*, 2020, **75**, 104896.
- 23 T. H. Kim, N. W. Park, M. A. Saeed, S. Y. Jeong, H. Y. Woo, J. Park and J. W. Shim, *Nano Energy*, 2023, **112**, 108429.
- 24 D. Lübke, P. Hartnagel, M. Hülsbeck and T. Kirchartz, *ACS Materials Au*, 2023, **3**, 215–230.
- 25 M. Casademont-Viñas, M. Gibert-Roca, M. Campoy-Quiles and A. R. Goñi, *Review of Scientific Instruments*, 2023, **94**, 103907.
